# Supplementary material for: Occurrence of Extended-Spectrum and AmpC-Type β-Lactamase Genes in Escherichia coli Isolated from Water Environments in Northern Thailand
Source: PubMed Central journal article supplement (PMC5606701; doi:10.1264/jsme2.me17050), 2017-09-27
Supplement: 32_293_s1.pdf [file 32_293_s1.pdf]

**Table S1.** Isolation sources and characteristics of 68 *Escherichia coli* isolates recovered from water environments in Northern Thailand.

| No. | Isolation source | City        | Resistant profile                      | $\beta$ -lactamase genes                                                        | Phylogenetic group |
|-----|------------------|-------------|----------------------------------------|---------------------------------------------------------------------------------|--------------------|
| 1   | pond             | Phitsanulok | AmpCtxCazAtmSAkKCipTeSxt               | <i>bla</i> <sub>CTX-M group 1</sub>                                             | B1                 |
| 2   | pond             | Phitsanulok | AmpCtxCazAtmFoxSCnKCipTeSxt            | <i>bla</i> <sub>CTX-M group 1</sub>                                             | D                  |
| 3   | pond             | Phitsanulok | AmpCtxCazAtmImpSCCip                   | <i>bla</i> <sub>CTX-M group 1</sub>                                             | B1                 |
| 4   | pond             | Phitsanulok | AmpCtxCazSKTeSxt                       | <i>bla</i> <sub>CTX-M group 1</sub>                                             | A                  |
| 5   | pond             | Phitsanulok | AmpCtxCazAtmFoxImpSAkK                 | <i>bla</i> <sub>CTX-M group 1</sub> <sup>+</sup><br><i>bla</i> <sub>CMY-2</sub> | A                  |
| 6   | pond             | Phitsanulok | AmpCtxCazAtmImpSKCCip                  | <i>bla</i> <sub>CTX-M group 1</sub>                                             | B1                 |
| 7   | pond             | Phitsanulok | AmpCtxCazAtmSKCCip                     | <i>bla</i> <sub>CTX-M group 1</sub>                                             | B1                 |
| 8   | pond             | Phitsanulok | AmpCtxCazAtmFoxEtpMemSCTeSxt           | –                                                                               | A                  |
| 9   | canal            | Phitsanulok | AmpCtxCazAtmSCCip                      | <i>bla</i> <sub>CTX-M group 1</sub>                                             | B1                 |
| 10  | canal            | Phitsanulok | AmpCtxCazAtmFoxSK                      | <i>bla</i> <sub>CTX-M group 1</sub> <sup>+</sup><br><i>bla</i> <sub>CMY-2</sub> | A                  |
| 11  | canal            | Phitsanulok | AmpCtxCazAtmSCnAkKTe                   | <i>bla</i> <sub>CTX-M group 1</sub>                                             | B1                 |
| 12  | canal            | Phitsanulok | AmpCtxCazAtmSCnAkKTe                   | <i>bla</i> <sub>CTX-M group 1</sub>                                             | B1                 |
| 13  | canal            | Phitsanulok | AmpCtxCazAtmSCnAkKTe                   | <i>bla</i> <sub>CTX-M group 1</sub>                                             | B1                 |
| 14  | canal            | Phitsanulok | AmpCtxCazAtmFoxImpEtpMemSCSxt          | –                                                                               | A                  |
| 15  | canal            | Phitsanulok | AmpCtxAtmSKCip                         | <i>bla</i> <sub>CTX-M group 9</sub>                                             | B2                 |
| 16  | canal            | Phitsanulok | AmpCtxCazAtmFoxEtpMemSCSxt             | –                                                                               | A                  |
| 17  | Tap water        | Phitsanulok | AmpCtxCazAtmFoxSKTe                    | <i>bla</i> <sub>CTX-M group 9</sub>                                             | A                  |
| 18  | Tap water        | Phitsanulok | AmpCtxCazAtmSKCTe                      | <i>bla</i> <sub>CTX-M group 1</sub>                                             | A                  |
| 19  | river            | Phitsanulok | AmpCtxCazAtmSCTeSxt                    | <i>bla</i> <sub>CTX-M group 1</sub>                                             | A                  |
| 20  | river            | Phitsanulok | AmpCtxCazAtmFoxSKTeSxt                 | <i>bla</i> <sub>CTX-M group 9</sub>                                             | A                  |
| 21  | river            | Phitsanulok | AmpCtxCazAtmSCip                       | <i>bla</i> <sub>CTX-M group 9</sub>                                             | B2                 |
| 22  | river            | Phitsanulok | AmpCtxCazAtmSCTe                       | <i>bla</i> <sub>CTX-M group 1</sub>                                             | B1                 |
| 23  | river            | Phitsanulok | AmpCtxSKTe                             | <i>bla</i> <sub>CTX-M group 9</sub>                                             | A                  |
| 24  | river            | Phitsanulok | AmpCtxCazAtmFoxIpmEtpMemSCnAkCCipTeSxt | –                                                                               | A                  |
| 25  | river            | Phitsanulok | AmpCtxCazAtmFoxIpmEtpMemSCSxt          | –                                                                               | A                  |
| 26  | canal            | Phitsanulok | AmpCtxCazAtmSAkKTeSxt                  | <i>bla</i> <sub>CTX-M group 9</sub>                                             | A                  |

|    |       |             |                                |                                                                                |    |
|----|-------|-------------|--------------------------------|--------------------------------------------------------------------------------|----|
| 27 | canal | Phitsanulok | AmpCtxCazAtmFoxIpmEtpMemSCSxt  | –                                                                              | A  |
| 28 | canal | Phitsanulok | AmpCtxCazAtmSCTeSxt            | <i>bla</i> <sub>CTX-M group 1</sub>                                            | B1 |
| 29 | pond  | Nakhonsawan | AmpCtxCazAtmSCnKCCipTeSxt      | <i>bla</i> <sub>CTX-M group 1</sub>                                            | B1 |
| 30 | pond  | Nakhonsawan | AmpCtxCazAtmSCnKCCipTeSxt      | <i>bla</i> <sub>CTX-M group 1</sub>                                            | B1 |
| 31 | pond  | Nakhonsawan | AmpCtxAtmFoxIpmEtpMem          | –                                                                              | A  |
| 32 | pond  | Nakhonsawan | AmpCtxCazAtmSCnAkKCCipTeSxt    | <i>bla</i> <sub>CTX-M group 1</sub>                                            | B1 |
| 33 | pond  | Nakhonsawan | AmpCtxCazAtmSCnKCCipTeSxt      | <i>bla</i> <sub>CTX-M group 1</sub>                                            | B1 |
| 34 | pond  | Nakhonsawan | AmpCtxCazAtmSKCCipTeSxt        | <i>bla</i> <sub>CTX-M group 1</sub>                                            | B1 |
| 35 | pond  | Nakhonsawan | AmpCtxAtmSCnKCCipTeSxt         | <i>bla</i> <sub>CTX-M group 1</sub>                                            | B1 |
| 36 | pond  | Nakhonsawan | AmpCtxCazAtmFoxSCnAkKCCipTeSxt | <i>bla</i> <sub>CTX-M group 1</sub>                                            | B1 |
| 37 | river | Nakhonsawan | AmpCtxCazAtmSKCCipTeSxt        | <i>bla</i> <sub>CTX-M group 1</sub>                                            | B1 |
| 38 | river | Nakhonsawan | AmpCtxCazAtmFoxSCnAkKCCipTeSxt | <i>bla</i> <sub>CTX-M group 9<sup>+</sup></sub><br><i>bla</i> <sub>CMY-2</sub> | A  |
| 39 | river | Nakhonsawan | AmpCtxCazAtmSKCCipTeSxt        | <i>bla</i> <sub>CTX-M group 1</sub>                                            | B1 |
| 40 | river | Nakhonsawan | AmpCtxCazFoxIpmSAkK            | <i>bla</i> <sub>CTX-M group 1</sub>                                            | A  |
| 41 | river | Nakhonsawan | AmpCtxCazAtmFoxSCnAkKCCipTeSxt | <i>bla</i> <sub>CTX-M group 9<sup>+</sup></sub><br><i>bla</i> <sub>CMY-2</sub> | D  |
| 42 | river | Nakhonsawan | AmpCtxCazAtmSCnAkKCCipTeSxt    | <i>bla</i> <sub>CTX-M group 1</sub>                                            | A  |
| 43 | river | Nakhonsawan | AmpCtxCazAtmSCnAkKCCipTeSxt    | <i>bla</i> <sub>CTX-M group 1</sub>                                            | B1 |
| 44 | river | Phitsanulok | AmpCtxCazAtmFoxSCnAkKCCipTeSxt | <i>bla</i> <sub>CTX-M group 1</sub>                                            | B1 |
| 45 | river | Phitsanulok | AmpCtxCazAtmFoxSCnKCCipTeSxt   | <i>bla</i> <sub>CTX-M group 1</sub>                                            | B1 |
| 46 | river | Phitsanulok | AmpCtxCazAtmSCnAkKCCipTeSxt    | <i>bla</i> <sub>CTX-M group 1</sub>                                            | B1 |
| 47 | canal | Phitsanulok | AmpCtxCazAtmSCnKCCipTeSxt      | <i>bla</i> <sub>CTX-M group 1</sub>                                            | B1 |
| 48 | canal | Phitsanulok | AmpCtxCazAtmSKCCipTeSxt        | <i>bla</i> <sub>CTX-M group 1</sub>                                            | B1 |
| 49 | canal | Phitsanulok | AmpCtxCazAtmSCnAkKCCipTeSxt    | <i>bla</i> <sub>CTX-M group 1</sub>                                            | B1 |
| 50 | canal | Phitsanulok | AmpCtxCazAtmIpmSCnAkKCCipTeSxt | <i>bla</i> <sub>CTX-M group 1</sub>                                            | B1 |
| 51 | canal | Phitsanulok | AmpCtxCazAtmSCnKCCipTeSxt      | <i>bla</i> <sub>CTX-M group 1</sub>                                            | B1 |
| 52 | canal | Phitsanulok | AmpCtxCazAtmFoxSCnAkKCCipTeSxt | <i>bla</i> <sub>CTX-M group 1</sub>                                            | B1 |
| 53 | canal | Phitsanulok | AmpCtxCazAtmFoxEtpMemSCSxt     | –                                                                              | A  |
| 54 | canal | Phitsanulok | AmpCtxCazAtmSCnKCCipTeSxt      | <i>bla</i> <sub>CTX-M group 1</sub>                                            | B1 |
| 55 | canal | Phitsanulok | AmpCtxCazAtmSCnKCCipTeSxt      | <i>bla</i> <sub>CTX-M group 1</sub>                                            | B1 |

|    |           |             |                                 |                                     |    |
|----|-----------|-------------|---------------------------------|-------------------------------------|----|
| 56 | canal     | Phitsanulok | AmpCtxCazAtmFoxIpmSCnKCCipTeSxt | <i>bla</i> <sub>CTX-M group 1</sub> | B1 |
| 57 | canal     | Phitsanulok | AmpCtxCazAtmSCnAkKCCipTeSxt     | <i>bla</i> <sub>CTX-M group 1</sub> | B1 |
| 58 | canal     | Phitsanulok | AmpCtxCazAtmMemSKCTeSxt         | <i>bla</i> <sub>CTX-M group 1</sub> | A  |
| 59 | canal     | Phitsanulok | AmpCtxCazAtmIpmSCnKCCipTeSxt    | <i>bla</i> <sub>CTX-M group 1</sub> | A  |
| 60 | canal     | Phitsanulok | AmpCtxCazAtmIpmSCnAkKCCipTeSxt  | <i>bla</i> <sub>CTX-M group 1</sub> | A  |
| 61 | canal     | Phitsanulok | AmpCtxCazAtmSCCipTeSxt          | <i>bla</i> <sub>CTX-M group 1</sub> | B1 |
| 62 | Tap water | Phitsanulok | AmpCtxCazAtmSKCCipTeSxt         | <i>bla</i> <sub>CTX-M group 1</sub> | A  |
| 63 | Tap water | Phitsanulok | AmpCtxCazAtmSCCipTeSxt          | <i>bla</i> <sub>CTX-M group 1</sub> | B1 |
| 64 | Tap water | Phitsanulok | AmpCtxCazAtmSCnKCCipTeSxt       | <i>bla</i> <sub>CTX-M group 1</sub> | B1 |
| 65 | Tap water | Phitsanulok | AmpCtxCazAtmSKCCipTeSxt         | <i>bla</i> <sub>CTX-M group 1</sub> | B1 |
| 66 | river     | Nakhonsawan | AmpCtxCazAtmSCipTe              | <i>bla</i> <sub>CTX-M group 1</sub> | B1 |
| 67 | river     | Nakhonsawan | AmpCtxSKCCipTeSxt               | <i>bla</i> <sub>CTX-M group 9</sub> | D  |
| 68 | river     | Nakhonsawan | AmpCtxCazAtmSKTe                | <i>bla</i> <sub>CTX-M group 1</sub> | A  |

Abbreviations: AMP, ampicillin; CTX, cefotaxime; CAZ, ceftazidime; ATM, aztreonam; FOX, ceftoxitin; IPM, imipenem; MEM, meropenem; ETP, ertapenem; S, streptomycin; CN, gentamicin; AK, amikacin; K, kanamycin; C, chloramphenicol; TE, tetracycline; CIP, ciprofloxacin and SXT, trimethoprim-sulfamethoxazole.
